# Supplementary material for: Fully integrated on-line strategy for highly sensitive proteome profiling of 10–500 mammalian cells
Source: Royal Society of Chemistry journal article supplement (doi:10.1039/d2an01508k), 2022-11-23
Supplement: d2an01508k1.pdf [file d2an01508k1.pdf]

SUPPORTING INFORMATION : Experimental section, Fig. S1–S3 and Tables S1-S2

## Fully Integrated On-line strategy for Highly Sensitive Proteome Profiling of 10-500 Mammalian Cells

Yun Yang,<sup>#,a,b,c</sup> Suhong Sun,<sup>#,d</sup> Shunji He,<sup>d</sup> Chengmin Liu,<sup>e</sup> Changying Fu,<sup>a</sup> Min  
Tang,<sup>f</sup> Chao Liu,<sup>f</sup> Ying Sun,<sup>e</sup> Henry Lam,<sup>b,\*</sup> Zhiyong Liu,<sup>d,\*</sup> Ruijun Tian<sup>a,\*</sup>

<sup>a</sup>Department of Chemistry, School of Science, Southern University of Science and Technology, No. 1088 Xueyuan Avenue, Nanshan District, Shenzhen 518055, China

<sup>b</sup>Department of Chemical and Biological Engineering, The Hong Kong University of Science & Technology, Clear Water Bay, Kowloon, Hong Kong;

<sup>c</sup>South China Institute of Biomedicine, No. 83 Ruihe Road, GuangZhou 510535, China

<sup>d</sup>Institute of Neuroscience, State Key Laboratory of Neuroscience, CAS Center for Excellence in Brain Science and Intelligence Technology, Chinese Academy of Sciences, Shanghai 200031, China;

<sup>e</sup>Department of Biology, Southern University of Science and Technology, No. 1088 Xueyuan Avenue, Nanshan District, Shenzhen 518055, China

<sup>f</sup>Beijing Advanced Innovation Center for Big Data-Based Precision Medicine, School of Medicine and Engineering, Beihang University, Beijing, 100191, China; and Key Laboratory of Big Data-Based Precision Medicine (Beihang University), Ministry of Industry and Information Technology

<sup>#</sup>Contributed equally

Corresponding Authors

**Ruijun Tian** E-mail: [tianrj@sustech.edu.cn](mailto:tianrj@sustech.edu.cn)

**Zhiyong Liu** E-mail: [zhiyongliu@ion.ac.cn](mailto:zhiyongliu@ion.ac.cn)

**Henry Lam** E-mail: [kehlam@ust.hk](mailto:kehlam@ust.hk)

## **Contents of SI materials**

|                                                                     |           |
|---------------------------------------------------------------------|-----------|
| <b>NanoLC-MS/MS Analysis on Q Exactive HF-X and Orbitrap Fusion</b> | <b>S3</b> |
| <b>NanoLC-MS/MS Analysis on timsTOF Pro</b>                         | <b>S3</b> |
| <b>Table S1</b>                                                     | <b>S4</b> |
| <b>Table S2</b>                                                     | <b>S6</b> |
| <b>Fig. S1</b>                                                      | <b>S7</b> |
| <b>Fig. S2</b>                                                      | <b>S8</b> |
| <b>References</b>                                                   | <b>S9</b> |

## Materials and methods

### NanoLC-MS/MS Analysis on Q Exactive HF-X and Orbitrap Fusion

The nanoLC and MS conditions on Q Exactive HF-X and Orbitrap Fusion were the same as previously reported.<sup>1</sup> The data of **Fig. 2** and **Fig. 3** were collected on a Q Exactive HF-X, while the data of **Fig. S1** were collected on a Orbitrap Fusion.

### NanoLC-MS/MS Analysis on timsTOF Pro

Pierce™ HeLa digest standard (PN 88329) was purchased from Thermo Fisher Scientific. A nanoElute UHPLC system was online coupled to a timsTOF Pro mass spectrometer with a CaptiveSpray nano-electrospray ion source (Bruker Daltonics). All columns were heated at 50°C using an integrated column oven (Sonation GmbH, Germany). Mobile phases A and B were water and acetonitrile with 0.1% FA, respectively. The flow rate was 250 nL/min and a segmented 110-min gradient was: 2%–22% (v/v) buffer B in 75 min, 22%–35% (v/v) buffer B for 15 min, 35%–80% (v/v) buffer B for 10 min, followed by a 10 min wash from 36% to 80% (v/v) buffer B. RCPR after processing hair cells was online connected to conventional 100 µm I.D. x 20 cm capillary columns via a zero dead volume PicoClear union (New Objective).

Optimized DDA parameters on timsTOF Pro are the following: MS range  $m/z$  300–1500 was scanned in positive electrospray mode; The mass spectrometer collected ion mobility MS spectra over  $1/k_0$  of 0.75 to 1.30, and then performed 4 cycles of parallel accumulation-serial fragmentation (PASEF) MS/MS with a target intensity of 5000 and a threshold of 500. The ramp time was 200 ms and total cycle time was 1.03 s. Only doubly or triply charged features were selected to trigger MS/MS scans; Peaks were dynamically excluded within 0.30 min except that when current intensity/previous intensity was over 3.0.

**Table S1.** Major published proteomic methods for profiling 10-2 000 mammalian cells.

| Cell number   | Cell type             | Number of identified protein groups | Sample preparation method            | Year published | References |
|---------------|-----------------------|-------------------------------------|--------------------------------------|----------------|------------|
| <b>10</b>     | HeLa                  | 1 500                               | nanoPOTS <sup>a</sup>                | 2018           | 2          |
|               | HeLa                  | 1 461                               | autoPOTS <sup>b</sup>                | 2021           | 3          |
| <b>~25</b>    | HeLa                  | ~ 1 800                             | μPOTS <sup>c</sup>                   | 2018           | 4          |
| <b>50</b>     | MCF-7                 | 1 017                               | In-solution                          | 2014           | 5          |
| <b>~56</b>    | HeLa                  | ~ 2 200                             | μPOTS                                | 2018           | 4          |
| <b>100</b>    | HeLa                  | 1 360                               | OAD chip                             | 2018           | 6          |
|               | DLD-1                 | 635                                 | iPAD-100 <sup>d</sup>                | 2015           | 7          |
|               | THP-1                 | 549                                 | In-solution                          | 2017           | 8          |
|               | Jurkat T              | 1 226                               | DMF-SP3 <sup>e</sup>                 | 2019           | 9          |
|               | HeLa                  | 644                                 | FAST <sup>f</sup>                    | 2021           | 10         |
|               | MCF-7                 | 1 895                               | micro-FASP <sup>g</sup>              | 2020           | 11         |
| <b>~130</b>   | B or T lymphocytes    | 1 095                               | autoPOTS                             | 2021           | 3          |
| <b>140</b>    | HeLa                  | 3 000                               | nanoPOTS                             | 2018           | 2          |
| <b>~150</b>   | HeLa                  | 2 679                               | autoPOTS                             | 2021           | 3          |
| <b>91-454</b> | human pancreatic cell | average: 2 676                      | nanoPOTS                             | 2018           | 2          |
| <b>500</b>    | DLD-1                 | 1 060                               | High temperature trypsin digestion   | 2015           | 7          |
|               | MCF-7                 | 187                                 | Acetone precipitation                | 2010           | 12         |
|               | HeLa                  | 905                                 | FASP <sup>h</sup>                    | 2011           | 13         |
|               | Jurkat T              | 2 467                               | on-chip SP3                          | 2019           | 9          |
|               | HeLa                  | 1 673                               | FAST                                 | 2021           | 10         |
| <b>~500</b>   | HeLa                  | 3 347                               | autoPOTS                             | 2021           | 3          |
| <b>650</b>    | HeLa                  | 5 805                               | nanoPOTS and prefractionation        | 2018           | 14         |
| <b>1 000</b>  | MCF-7                 | 271                                 | Acetone precipitation                | 2010           | 12         |
|               | HeLa                  | 1 536                               | FASP                                 | 2011           | 13         |
|               | Human macrophage      | 1 000                               | In-solution                          | 2014           | 15         |
|               | THP-1                 | 911                                 | In-solution                          | 2017           | 8          |
|               | U2OS osteosarcoma     | 829                                 | In-solution                          | 2019           | 16         |
|               | MCF-7                 | 1 895                               | micro-FASP                           | 2020           | 11         |
| <b>~1 440</b> | MCF-7                 | 3 402                               | AFA <sup>i</sup> assisted cell lysis | 2015           | 17         |
| <b>1 900</b>  | Rat brain tissue      | 1 500                               | On-tissue micro-digestion            | 2013           | 18         |

|               |          |        |       |                          |      |    |
|---------------|----------|--------|-------|--------------------------|------|----|
| <b>2 000</b>  | HEK 239T |        | 1 270 | SISPROT <sup>j</sup>     | 2016 | 19 |
| <b>~2 000</b> | Human    | breast | 1 426 | CAAR <sup>k</sup> -based | 2019 | 20 |
|               | cancer   |        |       | procedure                |      |    |

---

- a.* nanoPOTS: nanodroplet processing in one-pot for trace samples
- b.* autoPOTS: automated preparation in one pot for trace samples
- c.*  $\mu$ POTS: microdroplet processing in one pot for trace samples
- d.* iPAD-100: integrated proteome analysis device for 100 cells
- e.* DMF: digital microfluidics
- f.* FAST: fully automated sample treatment
- g.* micro-FASP: miniaturized filter-aided sample preparation
- h.* FASP: filter-aided sample preparation
- i.* AFA: Adaptive Focused Acoustics<sup>TM</sup>
- j.* SISPROT: simple and integrated proteomics sample preparation technology
- k.* CAAR: citric acid antigen retrieval

**Table S2.** Major changes of DDA parameters on timsTOF Pro during optimization.

| <b>Parameters</b>                                         | <b>Original</b> | <b>Optimized</b> |
|-----------------------------------------------------------|-----------------|------------------|
| <b>Mobilogram peak detection-<br/>intensity threshold</b> | 5 000           | 4 000            |
| <b>Mass range</b>                                         | 100-1 700       | 300-1 500        |
| <b>1/k<sub>0</sub></b>                                    | 0.60-1.60       | 0.75-1.30        |
| <b>Ramp time</b>                                          | 166             | 200              |
| <b>Charge range</b>                                       | 0-5             | 2-3              |
| <b>No. of PASEF MS/MS scans</b>                           | 10              | 4                |
| <b>Total cycle time</b>                                   | 1.89 s          | 1.03 s           |
| <b>Target intensity</b>                                   | 20 000          | 5 000            |
| <b>MS2 intensity threshold</b>                            | 1 000           | 500              |
| <b>Release after (min)</b>                                | 0.40            | 0.30             |
| <b>Current intensity/previous<br/>intensity</b>           | 4.00            | 3.00             |

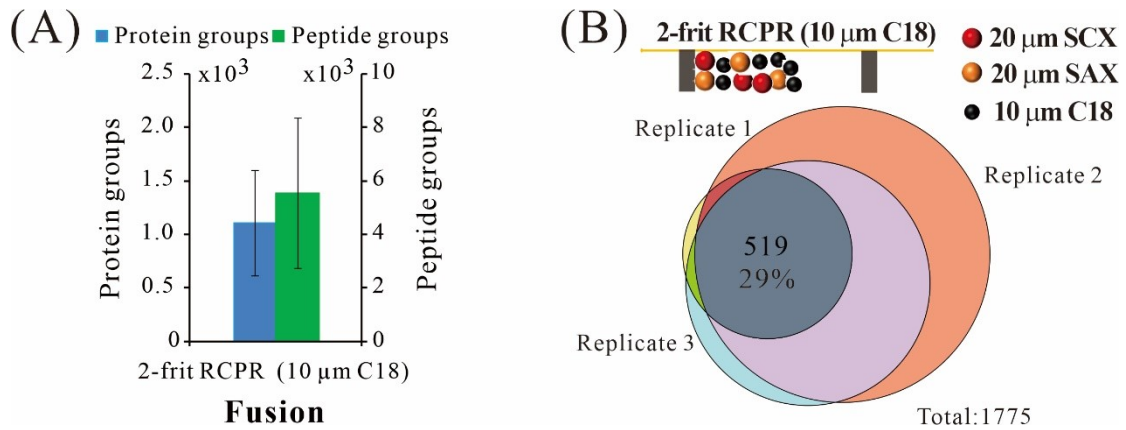

**Fig. S1.** (A) Identified protein groups and peptide groups from 10 ng of 293T total cell lysate processed by 2-frit mixed-mode RCPR (10  $\mu\text{m}$  C18). Error bars indicate standard deviations from three technical replicates. (B) Venn diagram of protein groups identified by this type of mixed-mode RCPR.

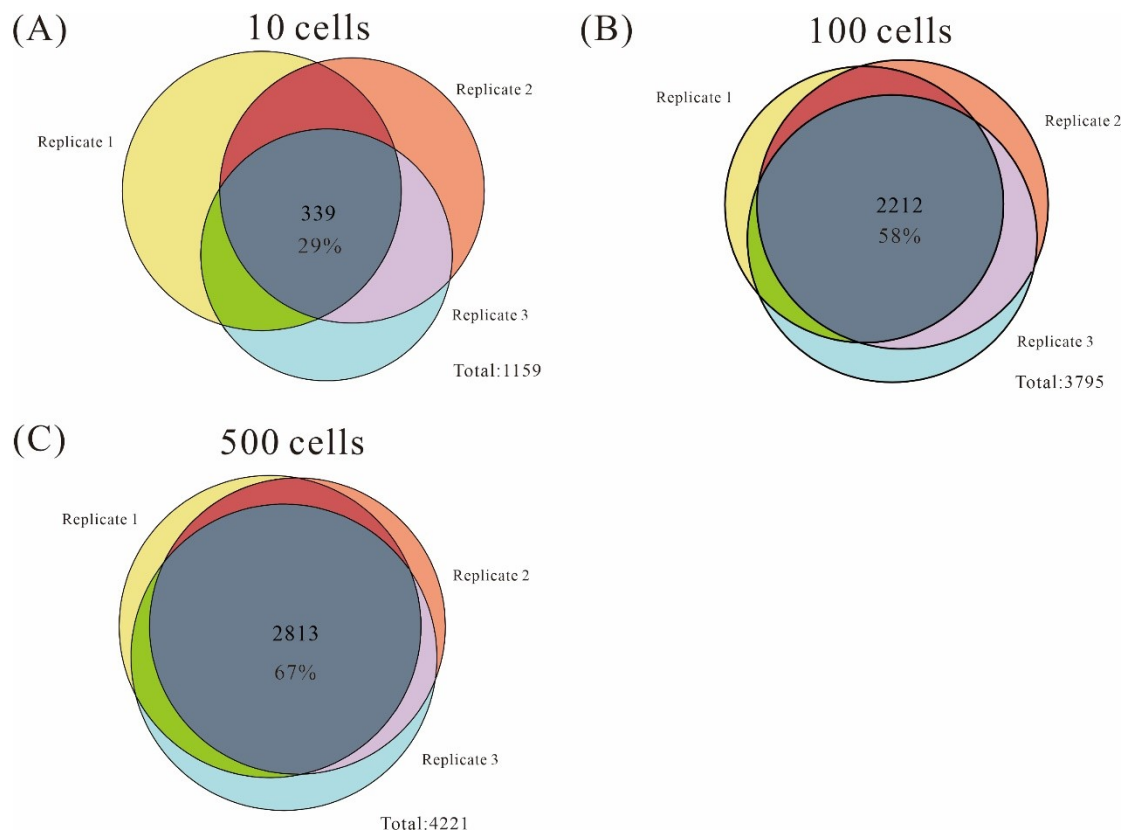

**Fig. S2.** Venn diagrams of label-free quantified protein groups from 10 (A), 100 (B), and 500 (C) FACS-sorted 293T cells.



## References

- 1 X. Ye, Y. Yang, J. Zhou, L. Xu, L. Wu, P. Huang, C. Feng, P. Ke, A. He, G. Li, Y. Li, Y. Li, H. Lam, X. Zhang and R. Tian, *Anal. Chim. Acta*, 2021, **1173**, 338672–338682.
- 2 Y. Zhu, P. D. Piehowski, R. Zhao, J. Chen, Y. Shen, R. J. Moore, A. K. Shukla, V. A. Petyuk, M. Campbell-Thompson, C. E. Mathews, R. D. Smith, W. J. Qian and R. T. Kelly, *Nat. Commun.*, 2018, **9**, 1–10.
- 3 Y. Liang, H. Acor, M. A. McCown, A. J. Nwosu, H. Boekweg, N. B. Axtell, T. Truong, Y. Cong, S. H. Payne and R. T. Kelly, *Anal. Chem.*, 2021, **93**, 1658–1666.
- 4 K. Xu, Y. Liang, P. D. Piehowski, M. Dou, K. C. Schwarz, R. Zhao, R. L. Sontag, R. J. Moore, Y. Zhu and R. T. Kelly, *Anal. Bioanal. Chem.*, 2019, **411**, 4587–4596.
- 5 J. Sun, G. L. Zhang, S. Li, A. R. Ivanov, D. Fenyo, F. Lisacek, S. K. Murthy, B. L. Karger and V. Brusica, *BMC Genomics*, 2014, **15**, S1–S10.
- 6 Z. Y. Li, M. Huang, X. K. Wang, Y. Zhu, J. S. Li, C. C. L. Wong and Q. Fang, *Anal. Chem.*, 2018, **90**, 5430–5438.
- 7 Q. Chen, G. Yan, M. Gao and X. Zhang, *Anal. Chem.*, 2015, **87**, 6674–6680.
- 8 K. Kasuga, Y. Katoh, K. Nagase and K. Igarashi, *Proteomics*, 2017, **17**, 1–7.
- 9 J. Leipert and A. Tholey, *Lab Chip*, 2019, **19**, 3490–3498.
- 10 H. Yuan, Z. Dai, X. Zhang, B. Zhao, H. Chu, L. Zhang and Y. Zhang, *Sci. China Chem.*, 2021, **64**, 313–321.
- 11 Z. Zhang, K. M. Dubiak, P. W. Huber and N. J. Dovichi, *Anal. Chem.*, 2020, **92**, 5554–5560.
- 12 N. Wang, M. Xu, P. Wang and L. Li, *Anal. Chem.*, 2010, **82**, 2262–2271.
- 13 J. R. Wiśniewski, P. Ostasiewicz and M. Mann, *J. Proteome Res.*, 2011, **10**, 3040–3049.
- 14 M. Dou, Y. Zhu, A. Liyu, Y. Liang, J. Chen, P. D. Piehowski, K. Xu, R. Zhao, R. J. Moore, M. A. Atkinson, C. E. Mathews, W. J. Qian and R. T. Kelly, *Chem. Sci.*, 2018, **9**, 6944–6951.
- 15 M. Brioschi, S. Eligini, M. Crisci, S. Fiorelli, E. Tremoli, S. Colli and C. Banfi, *Anal. Bioanal. Chem.*, 2014, **406**, 2817–2825.
- 16 R. Wu, S. Xing, M. Badv, T. F. Didar and Y. Lu, *Anal. Chem.*, 2019, **91**, 10395–10400.
- 17 S. Li, B. D. Plouffe, A. M. Belov, S. Ray, X. Wang, S. K. Murthy, B. L. Karger and A. R. Ivanov, *Mol. Cell. Proteomics*, 2015, **14**, 1672–1683.
- 18 J. Quanico, J. Franck, C. Dauly, K. Strupat, J. Dupuy, R. Day, M. Salzet, I. Fournier and M. Wisztorski, *J. Proteomics*, 2013, **79**, 200–218.
- 19 W. Chen, S. Wang, S. Adhikari, Z. Deng, L. Wang, L. Chen, M. Ke, P. Yang and R. Tian, *Anal. Chem.*, 2016, **88**, 4864–4871.
- 20 F. Dewez, M. Martin-Lorenzo, M. Herfs, D. Baiwir, G. Mazzucchelli, E. De Pauw, R. M. A. Heeren and B. Balluff, *Anal. Bioanal. Chem.*, 2019, **411**, 5647–5653.
